# Supplementary material
Source: Research Square preprint supplement (doi:10.21203/rs.3.rs-8950296/v1)
Supplement: Supplementary file 1 [file 0badf95f882abb29e92354b2.pdf]

# Appendix

## Wetland Offset Policy

Wetlands provide a wealth of public goods<sup>1</sup>. The conservation of wetlands, however, also presents substantial opportunity costs to private landowners who would otherwise develop the land. Wetland degradation has been regulated federally since 1973, starting with the Clean Water Act (CWA). Section 404 of the CWA requires permits to develop wetlands under the “no net loss” principle: that is, unavoidable impacts to wetland resources must be offset by restoration, enhancement, or preservation (USACE and EPA, 2008). In the early days of Section 404, compliance was mandated onsite (Salzman and Ruhl, 2006), which drew criticism for undue burden on the landowner as well as lack of oversight and regulation of actual ecological effectiveness and success (Sunding and Zilberman, 2002). Currently, developers can comply with CWA regulation through several mechanisms: 1) Permittee-Responsible-Mitigation, where the developer themselves undertakes a restoration project; 2) In-lieu Fee Mitigation, where a fee is paid to a fund for a future restoration project, or; 3) Mitigation banking, where credits are purchased from a bank that has carried out a large-scale restoration project in anticipation of degradation in the same watershed or “service area” (Levrel et al., 2017). Mitigation banking as an institution has rapidly gained popularity as the most flexible option of complying with the “no net loss” objective. For banks, mitigation activities usually involve restoring fallowed farmland to a more wild state, which is then managed and maintained in perpetuity (Erwin, 2009).

An intermediary regulator outlines the exchange value between restored and existing wetlands, which have a minimum 1:1 acreage exchange rate but are often evaluated further using criteria on ecological functionality<sup>2</sup>. Hydrologic boundaries and potential flood storage are often among the criteria used, but direct downstream flood protection benefits (i.e., number of households protected) are typically not considered in this system.

---

<sup>1</sup>Though they make up just 6% of the Earth’s surface, they contribute a crucial array of ecosystem services: biodiversity, carbon sequestration, nutrient cycling, aesthetics, and more (Gulbin et al., 2019) that can be challenging to evaluate and price. Studies estimate that 54–57% and potentially even up to 87% of wetlands have been lost globally since the 1700s (Gulbin et al., 2019).

<sup>2</sup>For example, Florida uses “uniform mitigation assessment method” (UMAM) scores to define specific trading ratios across a variety of wetland ecosystem types.

26 Prior to a bank’s establishment, it must go through an environmental review, outline specific  
27 restoration plans, and provide a timeline for carrying them out. Regulators assign a total number  
28 of credits to the project based on wetland functionality over time. Banks are then placed under  
29 conservation easement, preventing any future development on that site and allowing for long-term  
30 ecosystem recovery. Because banks serve as alternatives to on-site conservation, the land involved  
31 must be placed under a permanent conservation easement, preventing any future development or  
32 alternative uses. Furthermore, credits are released incrementally as the bank hits key restoration  
33 milestones (USACE and EPA, 2008).

## 34 **Housing Value and Population**

35 For robustness, we repeat our analysis using two alternative measures of downstream exposure:  
36 total housing value and population. We apply the same directional distance decay weighting  
37 methodology, replacing housing units with total housing value and population. The patterns re-  
38 main consistent: wetlands lost to development are disproportionately located in areas with higher  
39 downstream exposure, whether measured by population or housing value. In both panels of Fig-  
40 ure S-1b, the average cumulative distribution curve lies to the right of the reference line at 1.0,  
41 indicating that lost wetlands tend to have flood protection values well above the mean for restored  
42 bank wetlands. Similarly, when comparing housing value and population index distributions of  
43 developed wetlands compared with wetlands remaining in present day, the pattern follows Figure  
44 2 in the main text.

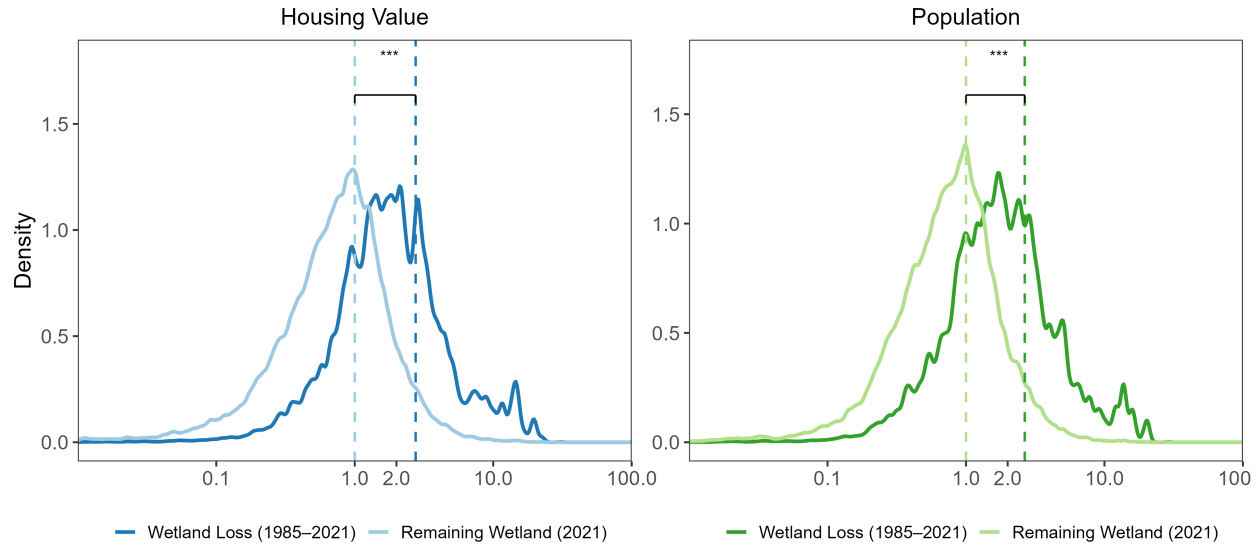

Flood Protection Index (Relative to Remaining Service Area Mean)

(a)

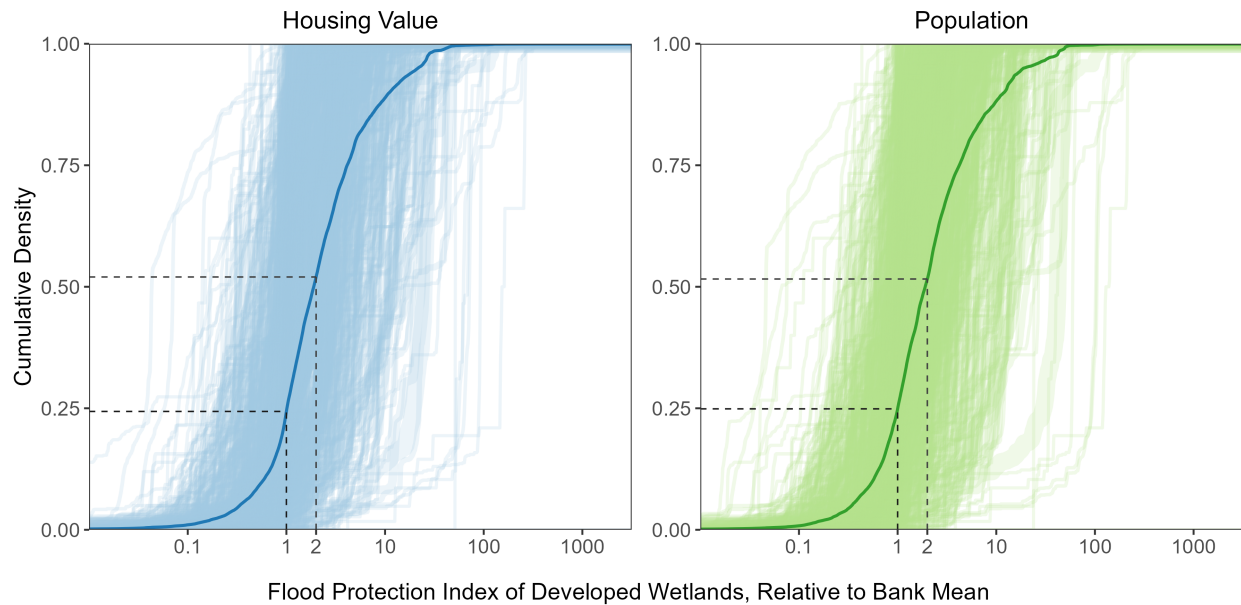

Flood Protection Index of Developed Wetlands, Relative to Bank Mean

(b)

Figure S-1: (a) Probability density functions of normalized flood protection indexes for lost (1985–2021, red) and remaining (2021, blue) wetlands across mitigation markets ( $n = 915$ ). Distributions are shown for two alternate flood protection indexes using housing value and population data as proxies for flood protection benefits. (b) Cumulative distribution functions of developed wetland flood protection indexes, normalized by the respective bank means, across all service areas ( $n = 695$ ). Thicker lines indicate markets with greater total wetland loss.

# 45 1 Land Value Analysis

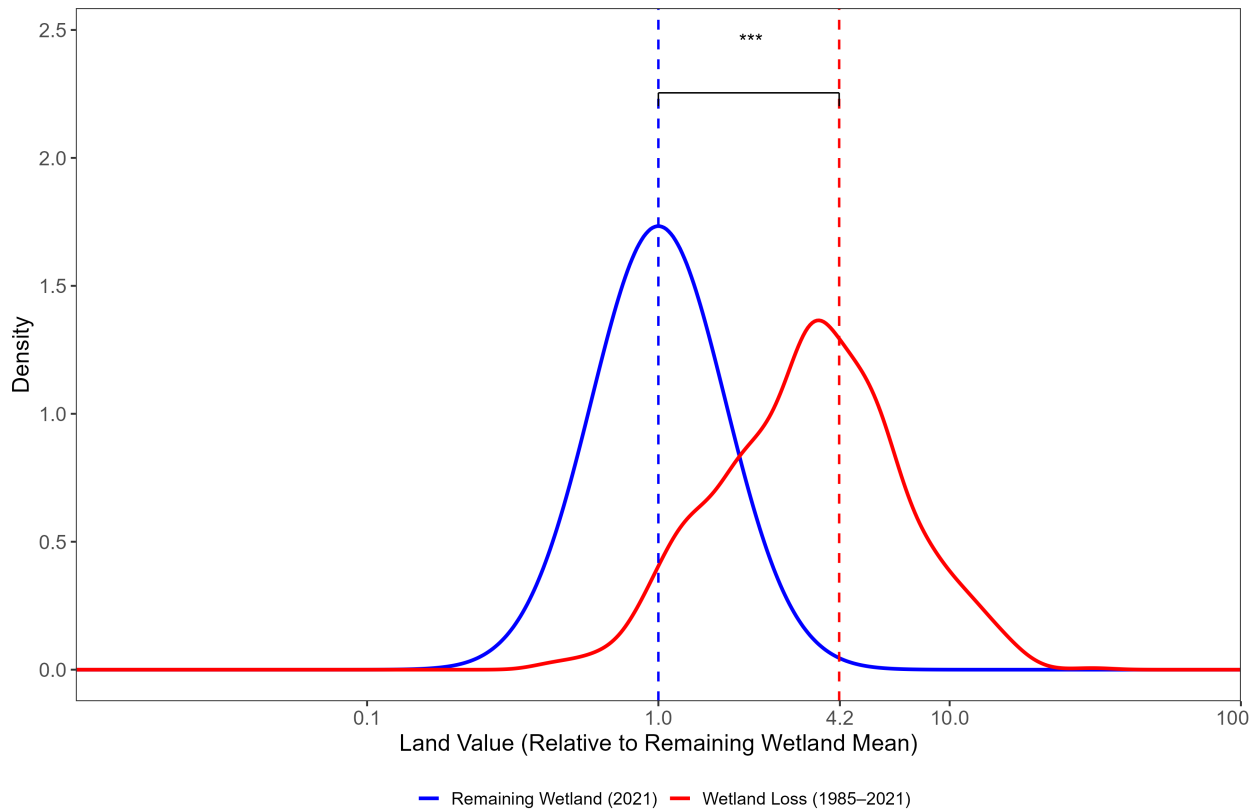

Figure S-2: Probability distribution function for normalized land values (Nolte, 2020) of lost (1985 - 2021, red) and remaining (2021, blue) wetlands in mitigation markets ( $n = 915$ ). Values on the  $x$ -axis are expressed as ratios to the mean land value for the corresponding service area (1 = service-area mean). The three stars represent a  $p$ -value of  $< 0.001$  in a two-tailed t-test.

## 46 Case Studies

### 47 Top Ten Highest Wetland Loss Value Service Areas

48 We identified the ten service areas the most downstream housing units of lost wetlands. All but  
49 one (Katy Prairie Stream), cluster in Southern Florida.

| <b>Bank / Area</b>                        | <b>Sum</b>      | <b>Mean</b> | <b>Max</b> |
|-------------------------------------------|-----------------|-------------|------------|
| <b>Service Areas</b>                      |                 |             |            |
| FP&L Everglades Phase II MB               | 192,274,418,184 | 24,634.567  | 472,971    |
| Poa Boy MB                                | 156,256,959,705 | 81,913.627  | 302,071    |
| Loxahatchee MB                            | 147,470,839,515 | 35,630.305  | 472,971    |
| Big Cypress MB Phase VI                   | 129,623,989,635 | 25,213.931  | 122,679    |
| Big Cypress MB Phase I-V                  | 129,621,443,360 | 25,217.606  | 122,679    |
| Panther Island MB – Expansion             | 129,240,514,671 | 25,165.396  | 122,679    |
| Panther Island MB                         | 128,990,113,342 | 25,136.187  | 122,679    |
| Katy Prairie Stream                       | 125,240,019,034 | 81,244.235  | 462,163    |
| St Johns MB                               | 121,540,093,306 | 92,853.476  | 302,071    |
| Florida Wetlandsbank at Pembroke Pines MB | 50,514,038,970  | 21,428.852  | 472,971    |
| Crosby Island Marsh MB                    | 45,528,876,319  | 75,576.886  | 199,468    |
| Little Pine Island MB                     | 39,503,913,338  | 48,314.260  | 124,040    |
| <b>Banks</b>                              |                 |             |            |
| FP&L Everglades Phase II MB               | 29,693,056,779  | 310,376.059 | 472,208    |
| Loxahatchee MB                            | 2,317,028,665   | 390,137.846 | 404,998    |
| Panther Island MB                         | 636,504,971     | 63,472.773  | 64,862     |
| Florida Wetlandsbank at Pembroke Pines MB | 406,041,491     | 283,746.674 | 290,381    |
| Panther Island MB – Expansion             | 386,103,642     | 63,988.008  | 65,448     |
| Crosby Island Marsh MB                    | 311,094,870     | 105,206.246 | 105,826    |
| Little Pine Island MB                     | 158,040,467     | 22,746.181  | 23,198     |
| St Johns MB                               | 93,947,271      | 48,854.535  | 63,645     |
| Katy Prairie Stream                       | 6,643,953       | 100,665.950 | 102,918    |
| Big Cypress MB Phase I-V                  | 4,300,164       | 2,795.945   | 3,144      |
| Big Cypress MB Phase VI                   | 1,753,888       | 2,549.255   | 3,103      |
| Poa Boy MB                                | 1,503,035       | 39,553.542  | 40,914     |
| <b>Loss Areas</b>                         |                 |             |            |
| FP&L Everglades Phase II MB               | 29,692,066,694  | 310,391.665 | 472,208    |
| Loxahatchee MB                            | 17,216,747,392  | 341,649.582 | 472,208    |
| Florida Wetlandsbank at Pembroke Pines MB | 13,582,088,005  | 368,407.736 | 472,208    |
| Panther Island MB                         | 10,424,054,222  | 75,427.856  | 122,572    |
| Big Cypress MB Phase I-V                  | 10,423,989,308  | 75,427.932  | 122,572    |
| Big Cypress MB Phase VI                   | 10,423,989,308  | 75,427.932  | 122,572    |
| Panther Island MB – Expansion             | 10,423,860,514  | 75,428.091  | 122,572    |
| Katy Prairie Stream                       | 7,325,699,734   | 158,048.364 | 462,169    |
| Little Pine Island MB                     | 4,892,911,662   | 67,695.726  | 124,650    |
| Crosby Island Marsh MB                    | 4,720,622,486   | 118,183.974 | 199,444    |
| Poa Boy MB                                | 4,373,018,293   | 141,750.998 | 293,784    |
| St Johns MB                               | 4,256,186,386   | 122,593.075 | 293,784    |

Table S-1: Housing units summary for South Florida wetland areas. Values represent downstream housing unit exposure across three categories: service areas, bank footprints, and areas of wetland loss (1985–2021).

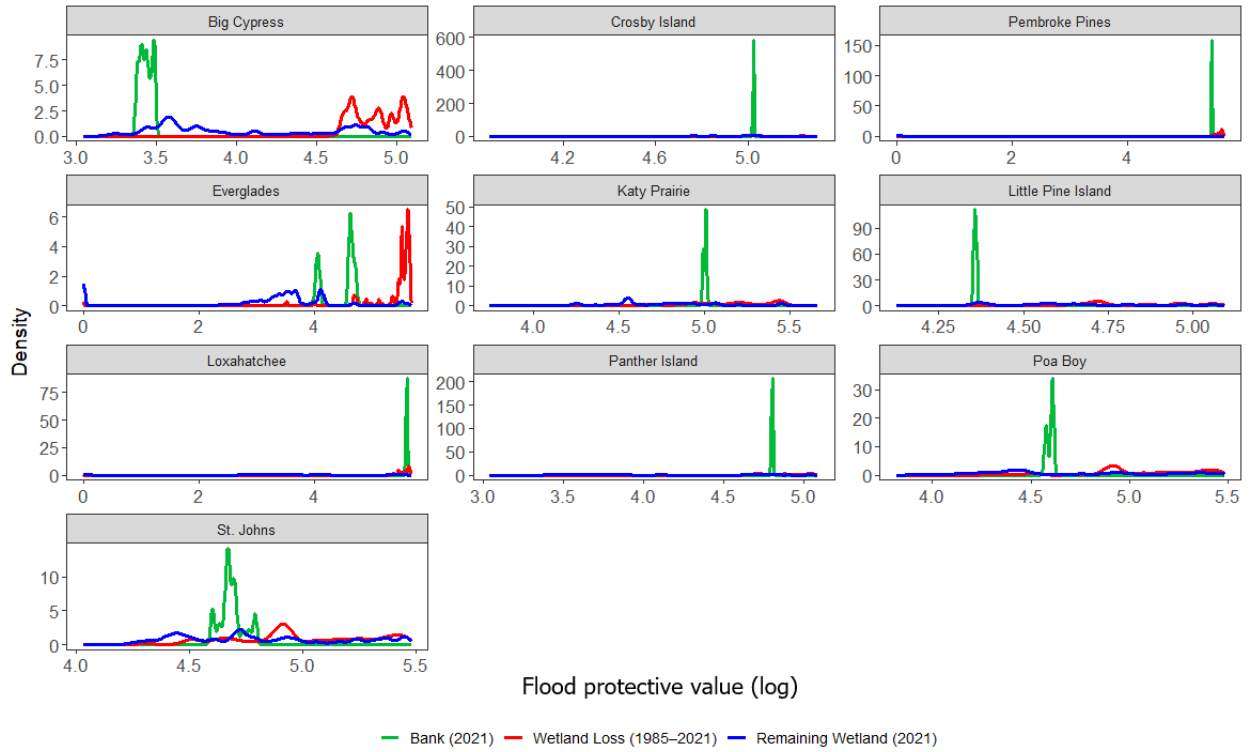

Figure S-3: Probability distribution functions of flood protective value (measured in terms of downstream housing units) for the top 10 service areas with the highest lost wetland value.

|                                         | Comparison   | Mean Loss | Mean Group | t-stat            | df    | Region    |
|-----------------------------------------|--------------|-----------|------------|-------------------|-------|-----------|
| Loxahatchee MB                          | bank         | 341,653   | 390,138    | -0.17             | 34.9  | S Florida |
|                                         | service area | 341,653   | 36,138     | 0.34***           | 721.1 |           |
| Little Pine Island MB                   | bank         | 67,653    | 22,746     | 0.44*             | 13.9  | S Florida |
|                                         | service area | 67,653    | 48,099     | 0.21 <sup>†</sup> | 51.5  |           |
| Panther Island MB                       | bank         | 75,428    | 63,666     | 0.15              | 12.6  | S Florida |
|                                         | service area | 75,428    | 25,211     | 0.26*             | 58.2  |           |
| Florida Wetlands Bank at Pembroke Pines | bank         | 368,394   | 283,747    | 0.20*             | 107.1 | S Florida |
|                                         | service area | 368,394   | 21,588     | 0.45***           | 312.4 |           |
| Big Cypress MB                          | bank         | 75,428    | 2,720      | 0.34**            | 54.1  | S Florida |
|                                         | service area | 75,428    | 25,211     | 0.26*             | 59.7  |           |
| Crosby Island Marsh MB                  | bank         | 118,184   | 105,206    | 0.09              | 14.7  | S Florida |
|                                         | service area | 118,184   | 75,722     | 0.23*             | 90.0  |           |
| St Johns MB                             | bank         | 122,593   | 48,855     | 0.22              | 25.5  | S Florida |
|                                         | service area | 122,593   | 92,789     | 0.05              | 145.6 |           |
| Katy Prairie Stream                     | bank         | 158,048   | 100,666    | 0.02              | 757.7 | S Texas   |
|                                         | service area | 158,048   | 81,245     | 0.19**            | 190.3 |           |
| Poa Boy MB                              | bank         | 141,751   | 39,554     | 0.05 <sup>†</sup> | 728.3 | S Florida |
|                                         | service area | 141,751   | 81,913     | 0.10              | 98.1  |           |
| FP L Everglades MB                      | bank         | 311,201   | 11,215     | 0.70 <sup>†</sup> | 3.1   | S Florida |
|                                         | service area | 311,201   | 24,072     | 0.36***           | 709.8 |           |

Table S-2: Characteristics of wetland markets with largest lost flood-protective value (measured in terms of downstream housing units) 1985-2021. T-statistics are based on the Dutilleul T-Test (Dutilleul et al., 1993), correcting for spatial autocorrelation. One, two and three stars indicate significance values of 0.05, 0.01, and 0.001 respectively, based on a one-tailed hypothesis test that the developed wetland flood-protection value is higher than either the bank or remaining undeveloped area value. <sup>†</sup> denotes marginal significance at the 0.1 level.

| Bank                                       | Comparison   | Mean Loss       | Mean Group      | t-stat            | df      |
|--------------------------------------------|--------------|-----------------|-----------------|-------------------|---------|
| Loxahatchee MB                             | bank         | 135,267,200,000 | 143,828,100,000 | -0.08             | 30.6    |
|                                            | service area | 135,267,200,000 | 14,086,210,000  | 0.37***           | 547.1   |
| Little Pine Island MB                      | bank         | 31,153,320,000  | 13,011,230,000  | 0.48*             | 13.1    |
|                                            | service area | 31,153,320,000  | 21,042,300,000  | 0.26*             | 38.6    |
| Panther Island MB                          | bank         | 39,356,780,000  | 36,307,930,000  | 0.09              | 17.4    |
|                                            | service area | 39,356,780,000  | 14,413,410,000  | 0.23*             | 60.2    |
| Florida Wetlands Bank at Pembroke Pines MB | bank         | 145,046,300,000 | 114,968,500,000 | 0.19*             | 106.4   |
|                                            | service area | 145,046,300,000 | 8,407,103,000   | 0.46***           | 269.7   |
| Big Cypress MB                             | bank         | 39,356,870,000  | 412,557,800     | 0.41***           | 183.1   |
|                                            | service area | 39,356,870,000  | 14,413,370,000  | 0.23*             | 61.0    |
| Crosby Island Marsh MB                     | bank         | 29,115,350,000  | 24,901,240,000  | 0.13              | 16.4    |
|                                            | service area | 29,115,350,000  | 18,728,670,000  | 0.23*             | 86.2    |
| St Johns MB                                | bank         | 32,782,770,000  | 10,870,950,000  | 0.29*             | 34.7    |
|                                            | service area | 32,782,770,000  | 23,932,200,000  | 0.08              | 128.1   |
| Katy Prairie Stream                        | bank         | 34,239,600,000  | 21,014,250,000  | 0.03              | 717.8   |
|                                            | service area | 34,239,600,000  | 18,310,380,000  | 0.13*             | 215.8   |
| Poa Boy MB                                 | bank         | 36,597,860,000  | 8,484,106,000   | 0.06*             | 1,204.5 |
|                                            | service area | 36,597,860,000  | 19,761,290,000  | 0.10              | 116.0   |
| FP L Everglades MB                         | bank         | 129,832,500,000 | 6,038,667,000   | 0.74 <sup>†</sup> | 2.7     |
|                                            | service area | 129,832,500,000 | 10,612,590,000  | 0.38***           | 585.2   |

Table S-3: One-tailed t-test comparison of downstream flood protective value (measured in terms of total housing value) between lost wetlands and bank / service area

| Bank                                       | Comparison   | Mean Loss | Mean Group | t-stat            | df    |
|--------------------------------------------|--------------|-----------|------------|-------------------|-------|
| Loxahatchee MB                             | bank         | 674,141   | 720,551    | -0.08             | 27.3  |
|                                            | service area | 674,141   | 73,395     | 0.36***           | 526.1 |
| Little Pine Island MB                      | bank         | 89,351    | 25,024     | 0.41 <sup>†</sup> | 13.1  |
|                                            | service area | 89,351    | 65,545     | 0.15 <sup>†</sup> | 73.2  |
| Panther Island MB                          | bank         | 97,915    | 82,074     | 0.12              | 13.2  |
|                                            | service area | 97,915    | 32,644     | 0.26*             | 71.2  |
| Florida Wetlands Bank at Pembroke Pines MB | bank         | 729,895   | 539,585    | 0.19*             | 91.5  |
|                                            | service area | 729,895   | 42,724     | 0.47***           | 285.8 |
| Big Cypress MB                             | bank         | 97,916    | 6,574      | 0.27*             | 55.4  |
|                                            | service area | 97,916    | 32,644     | 0.26*             | 67.0  |
| Crosby Island Marsh MB                     | bank         | 296,139   | 275,137    | 0.06              | 15.6  |
|                                            | service area | 296,139   | 187,421    | 0.24*             | 86.0  |
| St Johns MB                                | bank         | 276,175   | 112,714    | 0.19              | 31.4  |
|                                            | service area | 276,175   | 207,182    | 0.05              | 151.0 |
| Katy Prairie Stream                        | bank         | 402,128   | 264,934    | 0.03              | 613.3 |
|                                            | service area | 402,128   | 201,311    | 0.22**            | 154.0 |
| Poa Boy MB                                 | bank         | 325,518   | 89,674     | 0.05 <sup>†</sup> | 820.8 |
|                                            | service area | 325,518   | 190,079    | 0.09              | 101.7 |
| FP L Everglades MB                         | bank         | 628,525   | 17,888     | 0.69              | 2.9   |
|                                            | service area | 628,525   | 52,740     | 0.38***           | 550.8 |

Table S-4: One-tailed t-test comparison of downstream flood protective value (measured in terms of population) between lost wetlands and bank / service area

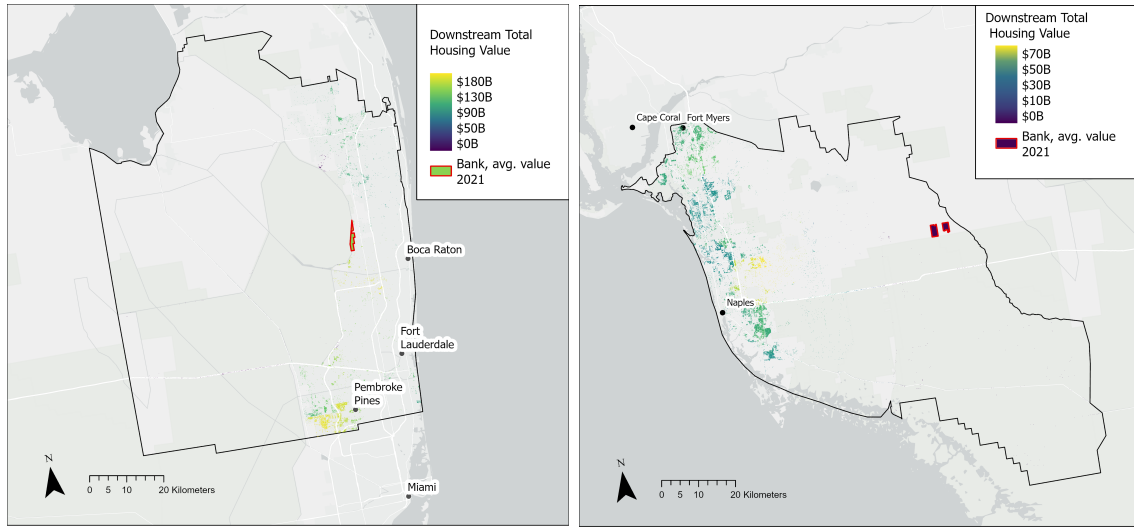

(a)

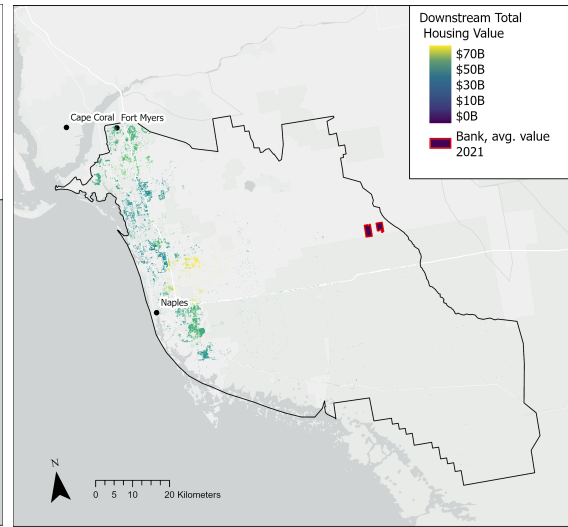

(d)

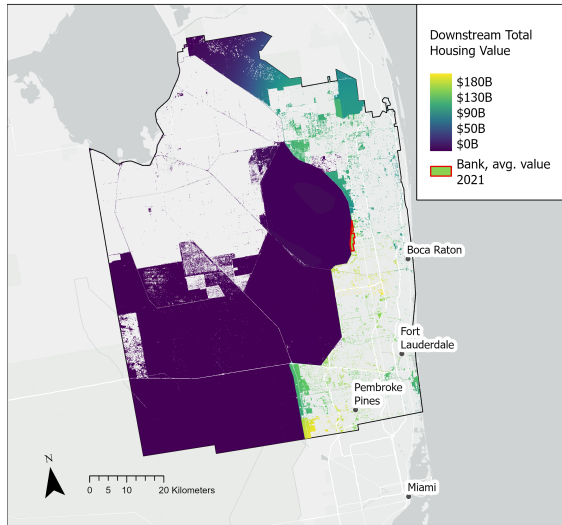

(b)

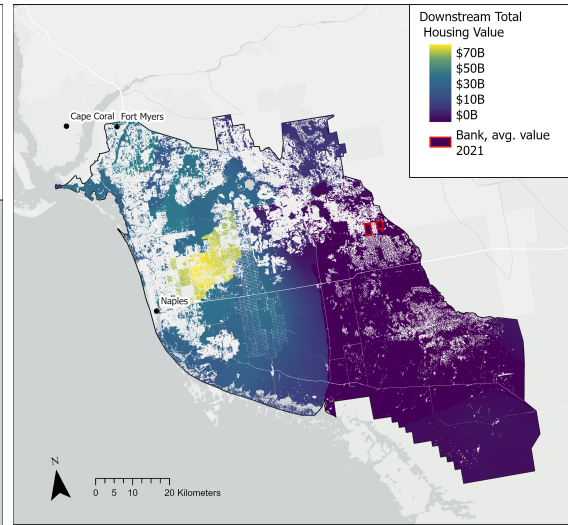

(e)

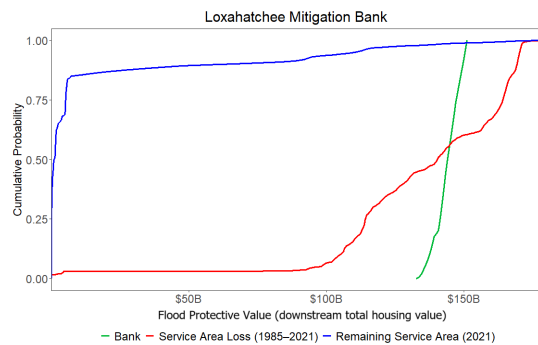

(c)

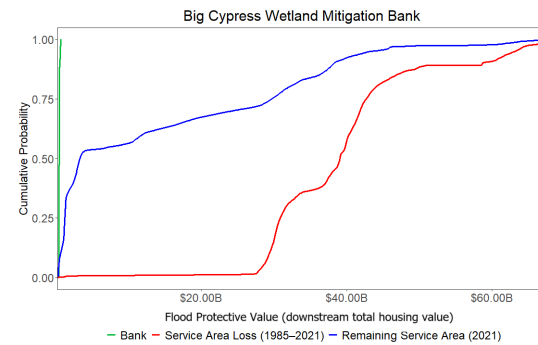

(f)

Figure S-4: Comparison of two mitigation bank service areas. Loxahatchee Mitigation Bank (a - c) and Big Cypress MB (d - f). (a, d) Downstream total housing value of wetland cells converted to development, 1985–2021. (b, e) Downstream total housing value of remaining wetland cells in 2021. (c, f) Empirical cumulative distribution functions comparing (a) and (b). Raster resolution: 30 m.

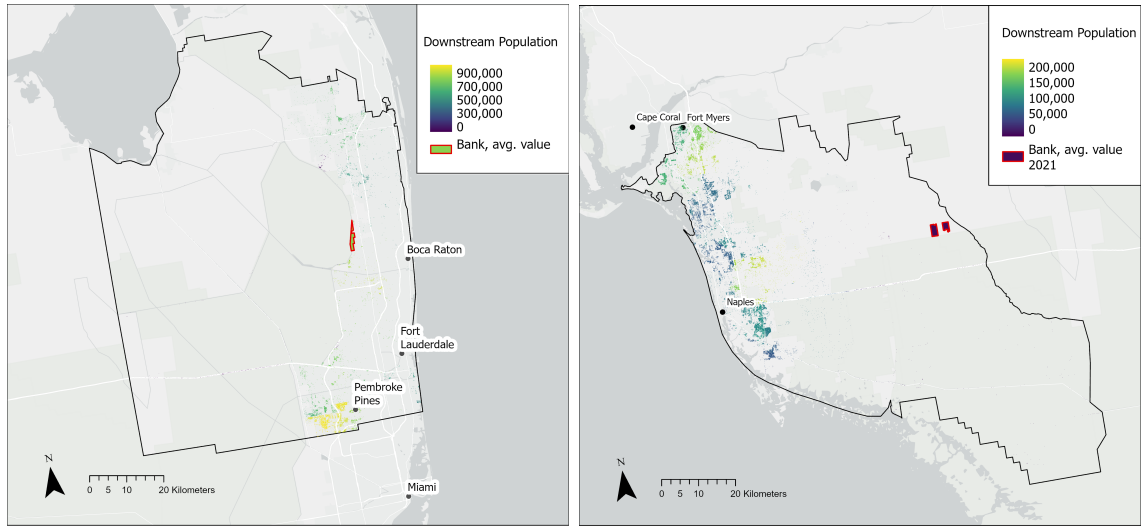

(a)

(d)

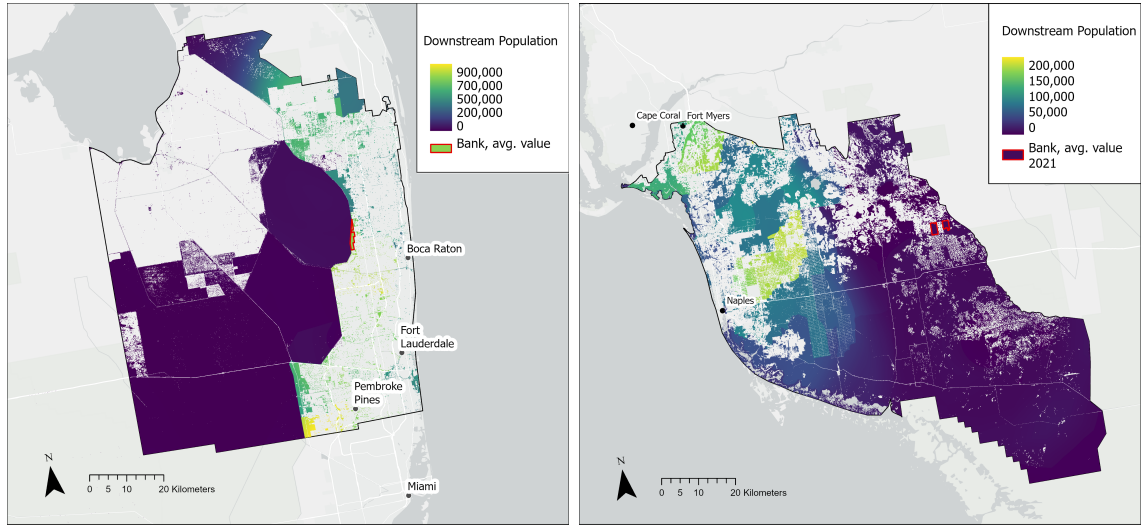

(b)

(e)

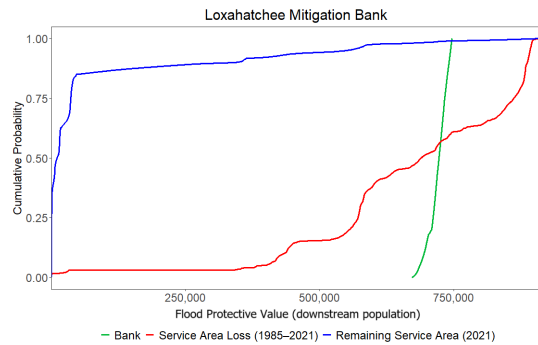

(c)

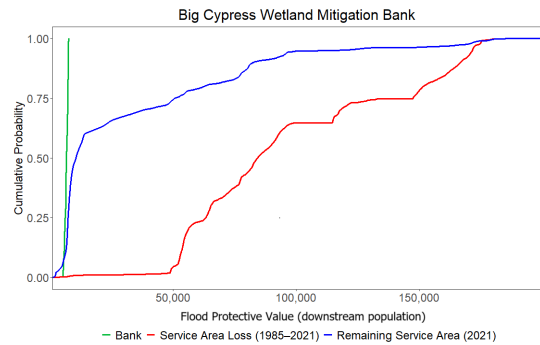

(f)

Figure S-5: Comparison of two mitigation bank service areas. Loxahatchee Mitigation Bank (a - c) and Big Cypress MB (d - f). (a, d) Downstream population of wetland cells converted to development, 1985–2021. (b, e) Downstream population of remaining wetland cells in 2021. (c, f) Empirical cumulative distribution functions comparing (a) and (b). Raster resolution: 30 m.

50 Downstream exposure is substantially and statistically significantly higher for lost wetlands or  
 51 remaining service area wetlands than for those restored in the Big Cypress mitigation bank. (Table  
 52 S-3, Table S-4). Loxahatchee Mitigation Bank shows a different pattern. While lost wetlands still  
 53 protected more people and property than those remaining, the bank wetlands in this case provide  
 54 similar flood protection value to the lost wetlands (though not statistically significant). However,  
 55 lost wetlands are notably higher value than remaining wetlands for housing value and population  
 56 ( $p > 0.001$ ) (Table S-3).

57 The service area of Loxahatchee MB contained lost wetland cells with the second-highest total  
 58 downstream housing unit exposure. The bank with the highest lost wetland cell value (Everglades  
 59 MB), is positioned on the southern coast of Florida and may have different flood protection benefits  
 60 due to hurricane-related storm surge.

## 61 State Trends in Lost Wetland Value

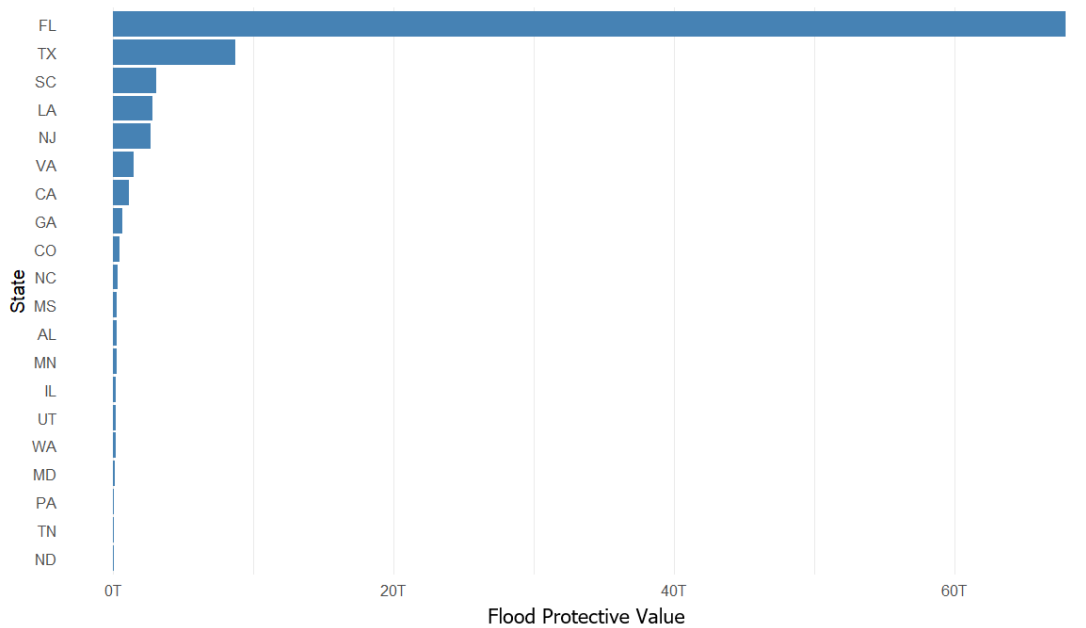

Figure S-6: Total flood-protective value (measured in terms of downstream housing units) of wetlands converted to development by state, 1985-2021.

62 Florida far outweighs all other states in terms of lost wetland flood protective value. This is  
 63 potentially driven by higher rates of development. The rest of the top states also cluster in the  
 64 Southeast.

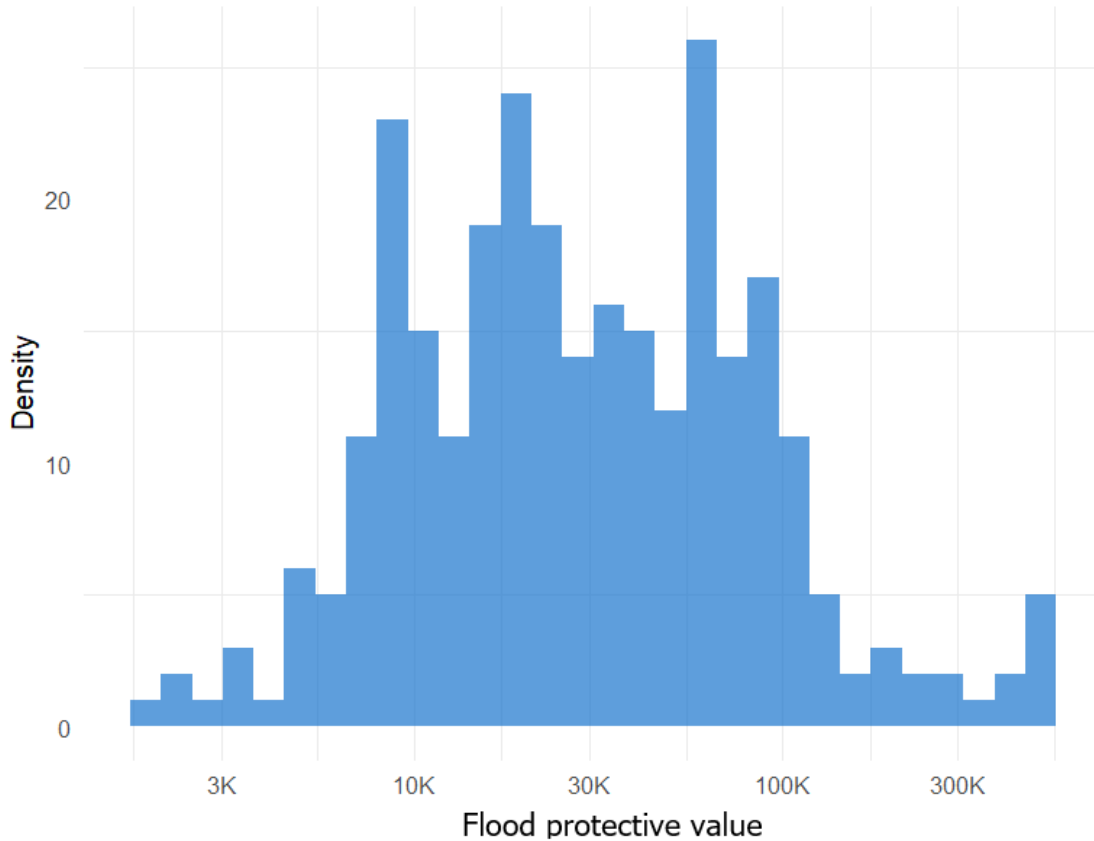

Figure S-7: Log mean flood protective value (measured in terms of downstream housing units) for 288 banks within a 40km buffer from CONUS coastline.

65 We isolate 288 mitigation banks that intersect a 40km coastal buffer to tease out whether  
 66 coastal banks (which often have few to none downstream census tracts) have systematically lower  
 67 flood protection value based on our function, which quantifies value unrelated to storm surge.  
 68 These coastal banks may be undervalued with our metric as they may protect communities from  
 69 hurricane-related damages.

## 70 **Distance Decay Interpolation**

71 For each 30m wetland cell  $w$ , we assign a flood protection weight  $f(d)$  based on its upstream  
72 distance  $d$  (in kilometers) from a downstream census tract centroid. We define a piecewise function  
73 with  $d$  values at 0, 10, 20, 30, and 40km:

$$f(d) = \begin{cases} 0.25, & d = 0 \\ 1, & d = 10 \text{ or } d = 30 \\ 0.75, & d = 20 \\ 0, & d \geq 40 \end{cases}$$

74 For all other values of  $d$ , we apply linear interpolation between the nearest defined points. For  
75 any two known distances  $d_1$  and  $d_2$ , with known weights  $f(d_1)$  and  $f(d_2)$ , the interpolated value  
76 at a distance  $d \in (d_1, d_2)$  is given by:

$$f(d) = f(d_1) + \left( \frac{d - d_1}{d_2 - d_1} \right) \cdot [f(d_2) - f(d_1)]$$

77 For example, a wetland pixel 15km upstream from a census tract centroid would receive a  
78 weight of:

$$f(15) = 1 + \left( \frac{15 - 10}{20 - 10} \right) \cdot (0.75 - 1) = 0.875$$

79 —

## 80 **Mitigation Ratios**

81 We valued losses and gains in wetland area at a 1 : 1 credit ratio, following the U.S. Army Corps  
82 of Engineers' compensatory-mitigation rule, which specifies that in the absence of a functional  
83 assessment, "a minimum one-to-one acreage or linear-foot compensation ratio must be used" to  
84 offset authorized impacts to waters of the United States (USACE and EPA, 2008). This baseline  
85 reflects the rule's core objective of "no net loss". While our analysis adopts the regulatory default  
86 for clarity and comparability, we acknowledge that the actual number of credits required can depart  
87 from 1 : 1 when site-specific factors warrant.

## 88 **References**

- 89 Dutilleul, P., Clifford, P., Richardson, S., and Hemon, D. (1993). Modifying the t test for assessing  
90 the correlation between two spatial processes. *Biometrics*, pages 305–314.
- 91 Erwin, K. L. (2009). Wetlands and global climate change: the role of wetland restoration in a  
92 changing world. *Wetlands Ecology and management*, 17(1):71–84.
- 93 Gulbin, S., Kirilenko, A. P., Kharel, G., and Zhang, X. (2019). Wetland loss impact on long term  
94 flood risks in a closed watershed. *Environmental science & policy*, 94:112–122.
- 95 Levrel, H., Scemama, P., and Vaissière, A.-C. (2017). Should we be wary of mitigation bank-  
96 ing? evidence regarding the risks associated with this wetland offset arrangement in florida.  
97 *Ecological Economics*, 135:136–149.
- 98 Nolte, C. (2020). High-resolution land value maps reveal underestimation of conservation costs in  
99 the united states. *Proceedings of the National Academy of Sciences*, 117(47):29577–29583.
- 100 Salzman, J. and Ruhl, J. (2006). No net loss: instrument choice in wetlands protection. pages  
101 323–351.
- 102 Sunding, D. and Zilberman, D. (2002). The economics of environmental regulation by licensing:  
103 An assessment of recent changes to the wetland permitting process. *Natural Resources Journal*,  
104 pages 59–90.
- 105 USACE and EPA (2008). Compensatory mitigation for losses of aquatic resources. 33 C.F.R. Part  
106 332, <https://www.ecfr.gov/current/title-33/chapter-II/part-332>.
